# Supplementary material for: Rainfall recharge thresholds decrease after an intense fire over a near-surface cave at Wombeyan, Australia
Source: Copernicus journal article supplement (doi:10.5194/hess-29-4241-2025), 2025-09-09
Supplement: Supplementary file 1 [file hess-29-4241-2025-supplement.pdf]

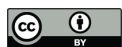

*Supplement of*

## **Rainfall recharge thresholds decrease after an intense fire over a near-surface cave at Wombeyan, Australia**

**Christina Song et al.**

*Correspondence to:* Andy Baker ([a.baker@unsw.edu.au](mailto:a.baker@unsw.edu.au))

The copyright of individual parts of the supplement might differ from the article licence.

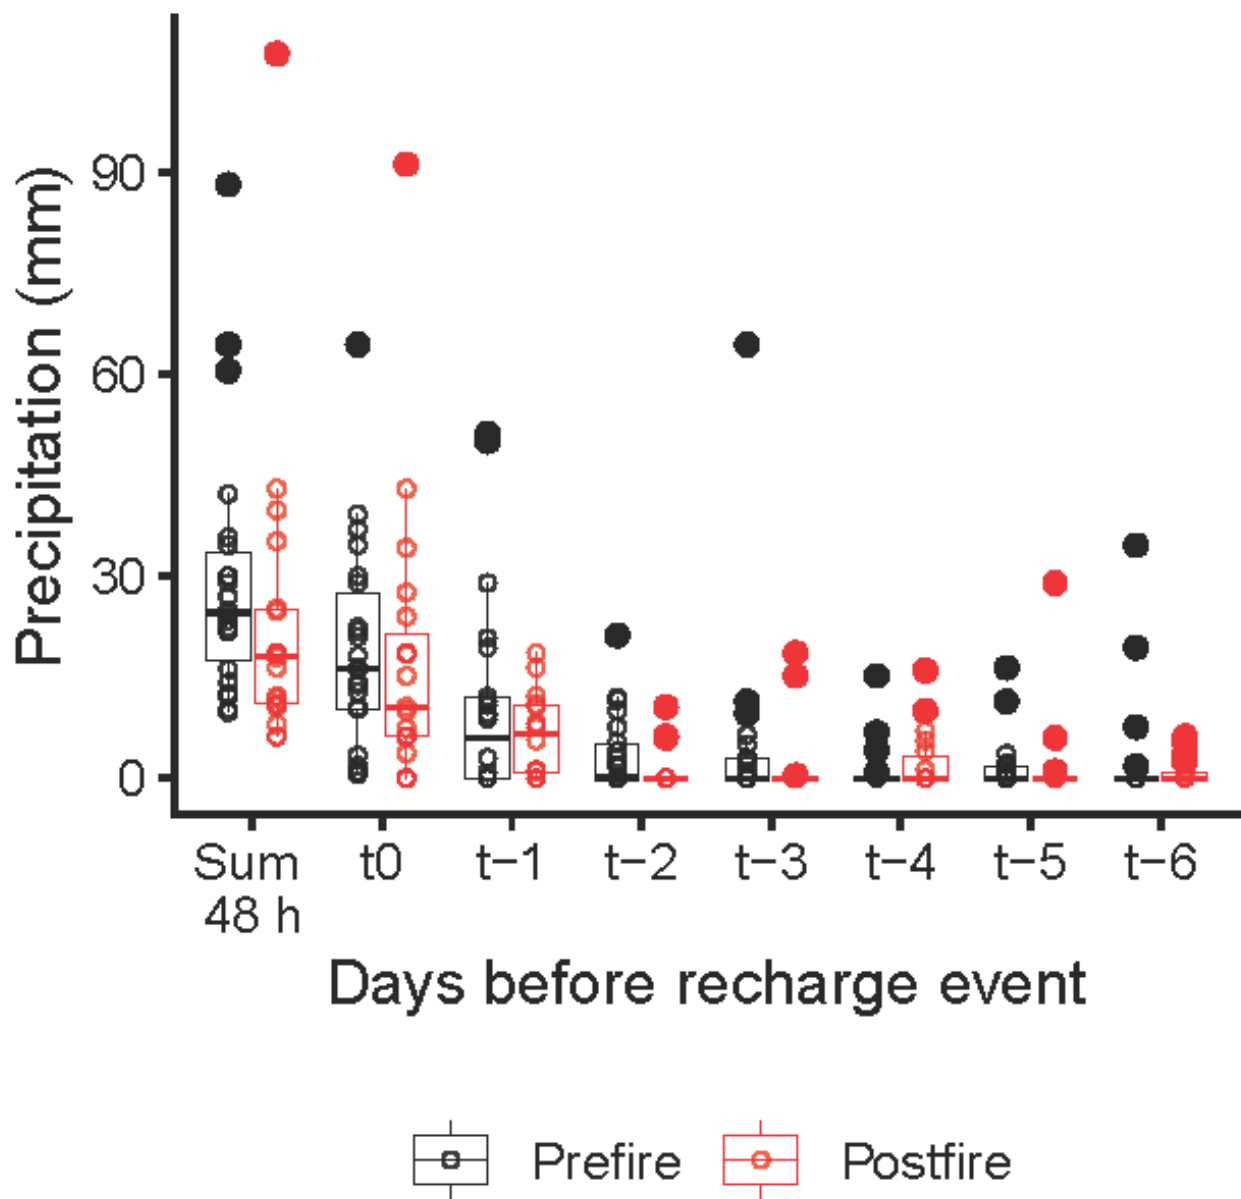

**Figure S1.** The amount of precipitation summed over the 48 hours prior to recharge compared to the amount of rainfall in each of the seven days prior to recharge. Precipitation data is shown for recharge events pre-fire (black) and post-fire (red).

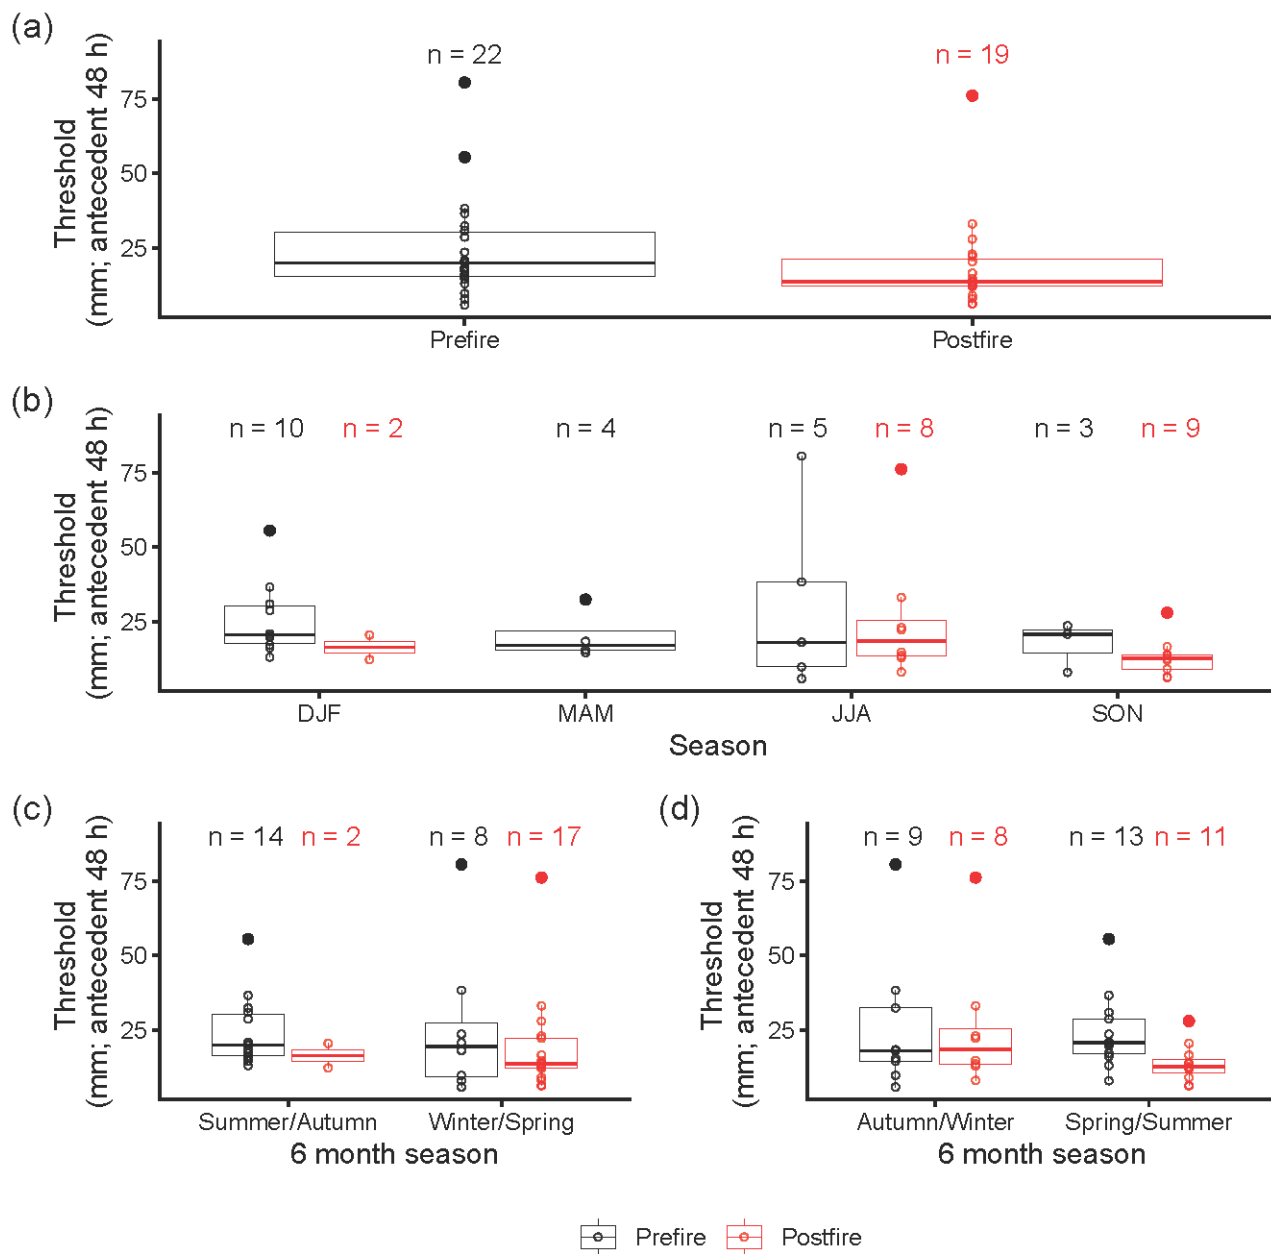

**Figure S2.** Comparison of recharge thresholds pre-and post-fire using AWRA-L data. Note that sample sizes are different depending on seasonal grouping, most comparable for panel d, where Autumn/Winter have 9 samples for pre-fire, 8 samples for post-fire, and spring/summer have 13 samples for pre-fire, 11 samples for post-fire.



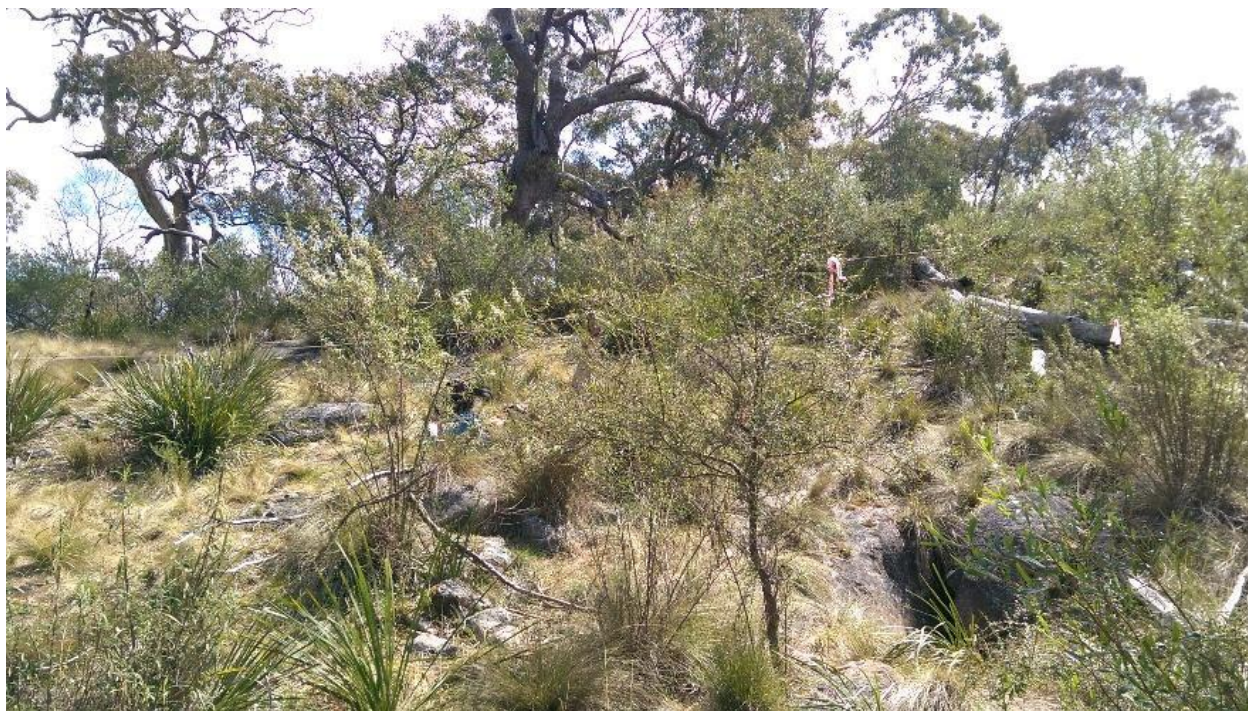

13

14

15

16

**Figure S3.** Four months post-fire Note the lack of surface ash. View is across slope, cave entrance is in foreground. Photo credit: Andy Baker

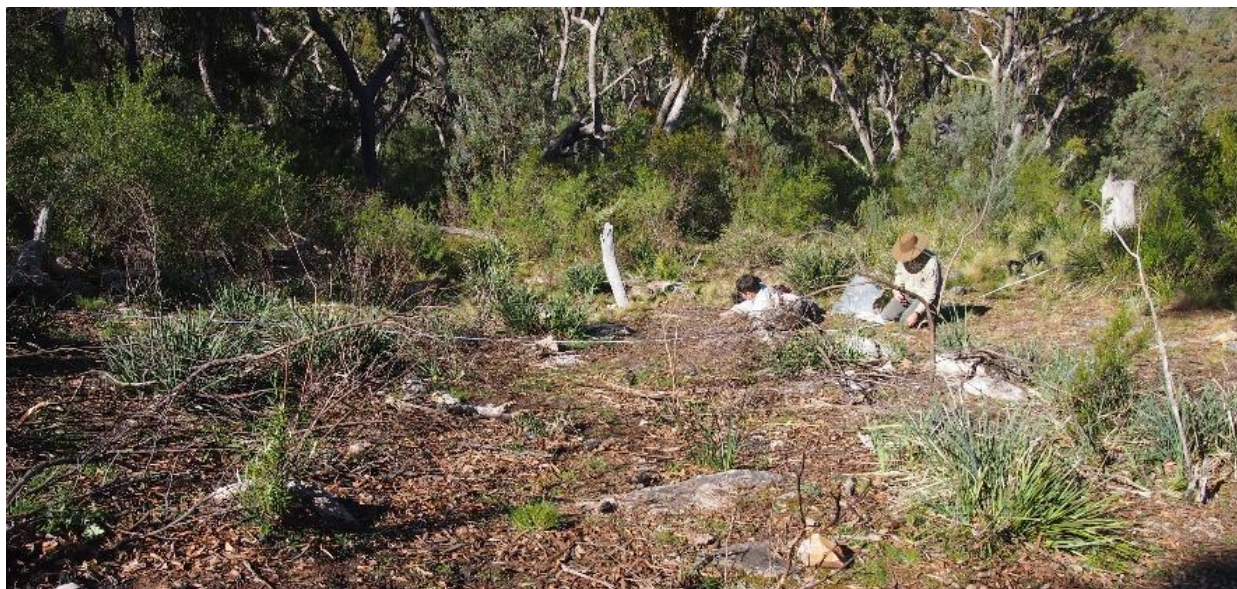

30

31

32

**Figure S4.** One year post-fire. Note lack of shrubby vegetation and patches of exposed limestone. View is downslope, Wildman's Cave is beneath the foreground surface. Photo credit: Andy Baker
